# Supplementary material
Source: MDPI journal article supplement (https://www.mdpi.com/2073-4352/10/2/69)

# checkCIF/PLATON report

You have not supplied any structure factors. As a result the full set of tests cannot be run.

THIS REPORT IS FOR GUIDANCE ONLY. IF USED AS PART OF A REVIEW PROCEDURE FOR PUBLICATION, IT SHOULD NOT REPLACE THE EXPERTISE OF AN EXPERIENCED CRYSTALLOGRAPHIC REFEREE.

No syntax errors found.      CIF dictionary      Interpreting this report

## Datablock: L3\_02967

---

|                 |                |                    |             |
|-----------------|----------------|--------------------|-------------|
| Bond precision: | C-C = 0.0028 A | Wavelength=0.71073 |             |
| Cell:           | a=10.9930(11)  | b=11.8907(10)      | c=9.4100(7) |
|                 | alpha=90       | beta=93.034(4)     | gamma=90    |
| Temperature:    | 200 K          |                    |             |
|                 | Calculated     | Reported           |             |
| Volume          | 1228.30(18)    | 1228.30(18)        |             |
| Space group     | C 2/c          | C 1 2/c 1          |             |
| Hall group      | -C 2yc         | -C 2yc             |             |
| Moiety formula  | C13 H9 N5 O4   | ?                  |             |
| Sum formula     | C13 H9 N5 O4   | C13 H9 N5 O4       |             |
| Mr              | 299.25         | 299.25             |             |
| Dx,g cm-3       | 1.618          | 1.618              |             |
| Z               | 4              | 4                  |             |
| Mu (mm-1)       | 0.125          | 0.125              |             |
| F000            | 616.0          | 616.0              |             |
| F000'           | 616.30         |                    |             |
| h,k,lmax        | 13,14,11       | 13,14,11           |             |
| Nref            | 1127           | 1127               |             |
| Tmin,Tmax       | 0.996,0.998    | 0.920,1.000        |             |
| Tmin'           | 0.995          |                    |             |

Correction method= # Reported T Limits: Tmin=0.920 Tmax=1.000  
AbsCorr = MULTI-SCAN

Data completeness= 1.000      Theta(max)= 25.340

R(reflections)= 0.0386( 784)      wR2(reflections)= 0.0977( 1127)

S = 1.014      Npar= 105

---

The following ALERTS were generated. Each ALERT has the format  
**test-name\_ALERT\_alert-type\_alert-level.**  
Click on the hyperlinks for more details of the test.

---

## ● Alert level C

PLAT250\_ALERT\_2\_C Large U3/U1 Ratio for Average U(i,j) Tensor .... 2.1 Note

---

## ● Alert level G

PLAT002\_ALERT\_2\_G Number of Distance or Angle Restraints on AtSite 2 Note  
PLAT172\_ALERT\_4\_G The CIF-Embedded .res File Contains DFIX Records 1 Report  
PLAT860\_ALERT\_3\_G Number of Least-Squares Restraints ..... 1 Note  
PLAT883\_ALERT\_1\_G No Info/Value for \_atom\_sites\_solution\_primary . Please Do !

---

0 **ALERT level A** = Most likely a serious problem - resolve or explain  
0 **ALERT level B** = A potentially serious problem, consider carefully  
1 **ALERT level C** = Check. Ensure it is not caused by an omission or oversight  
4 **ALERT level G** = General information/check it is not something unexpected

1 ALERT type 1 CIF construction/syntax error, inconsistent or missing data  
2 ALERT type 2 Indicator that the structure model may be wrong or deficient  
1 ALERT type 3 Indicator that the structure quality may be low  
1 ALERT type 4 Improvement, methodology, query or suggestion  
0 ALERT type 5 Informative message, check

---

## Datablock: L4\_02811

---

Bond precision: C-C = 0.0109 A

Wavelength=0.71073

Cell: a=12.1706(12) b=6.5022(7) c=20.4013(19)  
alpha=90 beta=90 gamma=90

Temperature: 250 K

|                | Calculated            | Reported        |
|----------------|-----------------------|-----------------|
| Volume         | 1614.5(3)             | 1614.5(3)       |
| Space group    | P n m a               | P n m a         |
| Hall group     | -P 2ac 2n             | -P 2ac 2n       |
| Moiety formula | 2(C13 H9 N5 O4), C2 N | ?               |
| Sum formula    | C28 H18 N11 O8        | C14 H9 N5.50 O4 |
| Mr             | 636.53                | 318.27          |
| Dx,g cm-3      | 1.309                 | 1.309           |
| Z              | 2                     | 4               |
| Mu (mm-1)      | 0.100                 | 0.100           |
| F000           | 654.0                 | 654.0           |
| F000'          | 654.31                |                 |
| h,k,lmax       | 14,7,24               | 14,7,24         |
| Nref           | 1617                  | 1619            |
| Tmin,Tmax      | 0.997,0.998           | 0.850,1.000     |
| Tmin'          | 0.984                 |                 |

Correction method= # Reported T Limits: Tmin=0.850 Tmax=1.000

AbsCorr = MULTI-SCAN

Data completeness= 1.001

Theta(max)= 25.330

R(reflections)= 0.1017( 847)

wR2(reflections)= 0.3585( 1619)

S = 1.105

Npar= 147

---

The following ALERTS were generated. Each ALERT has the format

**test-name\_ALERT\_alert-type\_alert-level.**

Click on the hyperlinks for more details of the test.

---

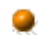

#### Alert level B

|                                                                    |             |
|--------------------------------------------------------------------|-------------|
| PLAT084_ALERT_3_B High wR2 Value (i.e. > 0.25) .....               | 0.36 Report |
| PLAT097_ALERT_2_B Large Reported Max. (Positive) Residual Density  | 1.13 eA-3   |
| PLAT315_ALERT_2_B Singly Bonded Carbon Detected (H-atoms Missing). | C15 Check   |
| PLAT340_ALERT_3_B Low Bond Precision on C-C Bonds .....            | 0.0109 Ang. |

---

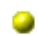

#### Alert level C

|                                                                     |              |
|---------------------------------------------------------------------|--------------|
| DIFMX02_ALERT_1_C The maximum difference density is > 0.1*ZMAX*0.75 |              |
| The relevant atom site should be identified.                        |              |
| RINTA01_ALERT_3_C The value of Rint is greater than 0.12            |              |
| Rint given 0.121                                                    |              |
| PLAT020_ALERT_3_C The Value of Rint is Greater Than 0.12 .....      | 0.121 Report |
| PLAT094_ALERT_2_C Ratio of Maximum / Minimum Residual Density ....  | 2.18 Report  |
| PLAT250_ALERT_2_C Large U3/U1 Ratio for Average U(i,j) Tensor ....  | 2.2 Note     |

---

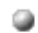

#### Alert level G

|                                                                    |             |
|--------------------------------------------------------------------|-------------|
| PLAT002_ALERT_2_G Number of Distance or Angle Restraints on AtSite | 3 Note      |
| PLAT007_ALERT_5_G Number of Unrefined Donor-H Atoms .....          | 2 Report    |
| PLAT045_ALERT_1_G Calculated and Reported Z Differ by a Factor ... | 0.50 Check  |
| PLAT072_ALERT_2_G SHELXL First Parameter in WGHT Unusually Large   | 0.20 Report |
| PLAT172_ALERT_4_G The CIF-Embedded .res File Contains DFIX Records | 2 Report    |
| PLAT173_ALERT_4_G The CIF-Embedded .res File Contains DANG Records | 1 Report    |
| PLAT300_ALERT_4_G Atom Site Occupancy of N6 Constrained at         | 0.5 Check   |
| PLAT300_ALERT_4_G Atom Site Occupancy of C14 Constrained at        | 0.5 Check   |
| PLAT300_ALERT_4_G Atom Site Occupancy of C15 Constrained at        | 0.5 Check   |
| PLAT302_ALERT_4_G Anion/Solvent/Minor-Residue Disorder (Resd 2 )   | 100% Note   |
| PLAT304_ALERT_4_G Non-Integer Number of Atoms in ..... (Resd 1 )   | 15.50 Check |
| PLAT304_ALERT_4_G Non-Integer Number of Atoms in ..... (Resd 2 )   | 0.75 Check  |
| PLAT650_ALERT_4_G SWAT Instruction Used to Model Solvent Disorder  | ! Report    |
| PLAT860_ALERT_3_G Number of Least-Squares Restraints .....         | 3 Note      |
| PLAT883_ALERT_1_G No Info/Value for _atom_sites_solution_primary . | Please Do ! |

---

- 0 **ALERT level A** = Most likely a serious problem - resolve or explain  
4 **ALERT level B** = A potentially serious problem, consider carefully  
5 **ALERT level C** = Check. Ensure it is not caused by an omission or oversight  
15 **ALERT level G** = General information/check it is not something unexpected

- 3 **ALERT type 1** CIF construction/syntax error, inconsistent or missing data  
6 **ALERT type 2** Indicator that the structure model may be wrong or deficient  
5 **ALERT type 3** Indicator that the structure quality may be low  
9 **ALERT type 4** Improvement, methodology, query or suggestion  
1 **ALERT type 5** Informative message, check
-

## Datablock: YbL3\_02349

---

Bond precision: C-C = 0.0092 A Wavelength=0.71073

Cell: a=20.2374(7) b=6.8593(3) c=29.4468(13)  
alpha=90 beta=90 gamma=90

Temperature: 150 K

|                | Calculated                                   | Reported             |
|----------------|----------------------------------------------|----------------------|
| Volume         | 4087.6(3)                                    | 4087.6(3)            |
| Space group    | P b c n                                      | P b c n              |
| Hall group     | -P 2n 2ab                                    | -P 2n 2ab            |
| Moiety formula | 2(C13 H7 N6 O9 Yb), C2 N,<br>2(H2 O), 2(H O) | ?                    |
| Sum formula    | C28 H20 N13 O22 Yb2                          | C14 H10 N6.50 O11 Yb |
| Mr             | 1236.65                                      | 618.32               |
| Dx,g cm-3      | 2.010                                        | 2.009                |
| Z              | 4                                            | 8                    |
| Mu (mm-1)      | 4.649                                        | 4.649                |
| F000           | 2380.0                                       | 2380.0               |
| F000'          | 2378.25                                      |                      |
| h,k,lmax       | 24,8,35                                      | 24,8,35              |
| Nref           | 3744                                         | 3741                 |
| Tmin,Tmax      | 0.818,0.995                                  | 0.840,0.990          |
| Tmin'          | 0.370                                        |                      |

Correction method= # Reported T Limits: Tmin=0.840 Tmax=0.990

AbsCorr = MULTI-SCAN

Data completeness= 0.999 Theta(max)= 25.350

R(reflections)= 0.0314( 2867) wR2(reflections)= 0.0714( 3741)

S = 1.101 Npar= 307

---

The following ALERTS were generated. Each ALERT has the format

**test-name\_ALERT\_alert-type\_alert-level.**

Click on the hyperlinks for more details of the test.

---

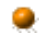

### Alert level B

PLAT315\_ALERT\_2\_B Singly Bonded Carbon Detected (H-atoms Missing).

C15 Check

---

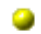

### Alert level C

RINTA01\_ALERT\_3\_C The value of Rint is greater than 0.12

Rint given 0.124

PLAT213\_ALERT\_2\_C Atom N5

has ADP max/min Ratio .....

3.3 oblate

PLAT214\_ALERT\_2\_C Atom C15

(Anion/Solvent) ADP max/min Ratio

4.6 prolat

|                   |                                             |                         |           |
|-------------------|---------------------------------------------|-------------------------|-----------|
| PLAT223_ALERT_4_C | Solv./Anion Resd 3 H                        | Ueq(max)/Ueq(min) Range | 4.5 Ratio |
| PLAT244_ALERT_4_C | Low Solvent Ueq as Compared to Neighbors of | C14 Check               |           |
| PLAT342_ALERT_3_C | Low Bond Precision on C-C Bonds .....       | 0.00918 Ang.            |           |

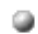

#### Alert level G

|                   |                                                  |              |
|-------------------|--------------------------------------------------|--------------|
| PLAT002_ALERT_2_G | Number of Distance or Angle Restraints on AtSite | 5 Note       |
| PLAT004_ALERT_5_G | Polymeric Structure Found with Maximum Dimension | 2 Info       |
| PLAT020_ALERT_3_G | The Value of Rint is Greater Than 0.12 .....     | 0.124 Report |
| PLAT045_ALERT_1_G | Calculated and Reported Z Differ by a Factor ... | 0.50 Check   |
| PLAT083_ALERT_2_G | SHELXL Second Parameter in WGHT Unusually Large  | 17.62 Why ?  |
| PLAT172_ALERT_4_G | The CIF-Embedded .res File Contains DFIX Records | 2 Report     |
| PLAT344_ALERT_2_G | Unusual sp? Angle Range in Solvent/Ion for       | C15 Check    |
| PLAT367_ALERT_2_G | Long? C(sp?)-C(sp?) Bond C14 - C15 .             | 1.51 Ang.    |
| PLAT764_ALERT_4_G | Overcomplete CIF Bond List Detected (Rep/Expd) . | 1.16 Ratio   |
| PLAT794_ALERT_5_G | Tentative Bond Valency for Yb1 (III) .           | 3.27 Info    |
| PLAT860_ALERT_3_G | Number of Least-Squares Restraints .....         | 3 Note       |
| PLAT883_ALERT_1_G | No Info/Value for _atom_sites_solution_primary . | Please Do !  |
| PLAT933_ALERT_2_G | Number of OMIT Records in Embedded .res File ... | 3 Note       |

0 **ALERT level A** = Most likely a serious problem - resolve or explain  
 1 **ALERT level B** = A potentially serious problem, consider carefully  
 6 **ALERT level C** = Check. Ensure it is not caused by an omission or oversight  
 13 **ALERT level G** = General information/check it is not something unexpected

2 ALERT type 1 CIF construction/syntax error, inconsistent or missing data  
 8 ALERT type 2 Indicator that the structure model may be wrong or deficient  
 4 ALERT type 3 Indicator that the structure quality may be low  
 4 ALERT type 4 Improvement, methodology, query or suggestion  
 2 ALERT type 5 Informative message, check

## Datablock: YbL4\_02351

Bond precision: C-C = 0.0380 A

Wavelength=0.71073

|              |                 |                 |                 |
|--------------|-----------------|-----------------|-----------------|
| Cell:        | a=4.7056(17)    | b=9.193(3)      | c=15.322(6)     |
|              | alpha=72.711(9) | beta=88.774(11) | gamma=86.788(9) |
| Temperature: | 296 K           |                 |                 |

|                | Calculated        | Reported          |
|----------------|-------------------|-------------------|
| Volume         | 631.9(4)          | 631.9(4)          |
| Space group    | P -1              | P -1              |
| Hall group     | -P 1              | -P 1              |
| Moiety formula | C26 H15 N10 O8 Yb | ?                 |
| Sum formula    | C26 H15 N10 O8 Yb | C26 H15 N10 O8 Yb |
| Mr             | 768.52            | 768.52            |
| Dx,g cm-3      | 2.020             | 2.020             |
| Z              | 1                 | 1                 |
| Mu (mm-1)      | 3.777             | 3.777             |
| F000           | 375.0             | 375.0             |
| F000'          | 374.77            |                   |
| h,k,lmax       | 5,11,18           | 5,11,18           |
| Nref           | 2321              | 2304              |
| Tmin,Tmax      | 0.873,0.945       | 0.750,0.950       |
| Tmin'          | 0.530             |                   |

Correction method= # Reported T Limits: Tmin=0.750 Tmax=0.950  
AbsCorr = MULTI-SCAN

Data completeness= 0.993                      Theta(max)= 25.350

R(reflections)= 0.0901( 1861)              wR2(reflections)= 0.2669( 2304)

S = 1.090                                      Npar= 177

---

The following ALERTS were generated. Each ALERT has the format  
**test-name\_ALERT\_alert-type\_alert-level.**  
Click on the hyperlinks for more details of the test.

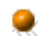

#### Alert level B

PLAT342\_ALERT\_3\_B Low Bond Precision on C-C Bonds ..... 0.038 Ang.

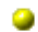

#### Alert level C

RINTA01\_ALERT\_3\_C The value of Rint is greater than 0.12

Rint given 0.137

PLAT020\_ALERT\_3\_C The Value of Rint is Greater Than 0.12 ..... 0.137 Report

PLAT084\_ALERT\_3\_C High wR2 Value (i.e. > 0.25) ..... 0.27 Report

PLAT234\_ALERT\_4\_C Large Hirshfeld Difference N1 --C1 . 0.17 Ang.

PLAT241\_ALERT\_2\_C High MainMol Ueq as Compared to Neighbors of O1 Check

PLAT242\_ALERT\_2\_C Low MainMol Ueq as Compared to Neighbors of C13 Check

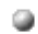

#### Alert level G

PLAT007\_ALERT\_5\_G Number of Unrefined Donor-H Atoms ..... 1 Report

PLAT072\_ALERT\_2\_G SHELXL First Parameter in WGHT Unusually Large 0.17 Report

PLAT083\_ALERT\_2\_G SHELXL Second Parameter in WGHT Unusually Large 9.51 Why ?

PLAT171\_ALERT\_4\_G The CIF-Embedded .res File Contains EADP Records 2 Report

PLAT232\_ALERT\_2\_G Hirshfeld Test Diff (M-X) Yb1 --O1 . 5.1 s.u.

PLAT300\_ALERT\_4\_G Atom Site Occupancy of H2O Constrained at 0.5 Check

PLAT650\_ALERT\_4\_G SWAT Instruction Used to Model Solvent Disorder ! Report

PLAT764\_ALERT\_4\_G Overcomplete CIF Bond List Detected (Rep/Expd) . 1.17 Ratio  
 PLAT779\_ALERT\_4\_G Suspect or Irrelevant (Bond) Angle(s) in CIF . # 68 Check  
           O4 -C13 -Yb1 1.555 1.555 1.345 39.30 Deg.  
 PLAT794\_ALERT\_5\_G Tentative Bond Valency for Yb1 (III) . 3.33 Info  
 PLAT804\_ALERT\_5\_G Number of ARU-Code Packing Problem(s) in PLATON 28 Info  
 PLAT883\_ALERT\_1\_G No Info/Value for \_atom\_sites\_solution\_primary . Please Do !

---

0 **ALERT level A** = Most likely a serious problem - resolve or explain  
 1 **ALERT level B** = A potentially serious problem, consider carefully  
 6 **ALERT level C** = Check. Ensure it is not caused by an omission or oversight  
 12 **ALERT level G** = General information/check it is not something unexpected

1 ALERT type 1 CIF construction/syntax error, inconsistent or missing data  
 5 ALERT type 2 Indicator that the structure model may be wrong or deficient  
 4 ALERT type 3 Indicator that the structure quality may be low  
 6 ALERT type 4 Improvement, methodology, query or suggestion  
 3 ALERT type 5 Informative message, check

---

## Datablock: TbYbL3\_02366

---

Bond precision: C-C = 0.0223 A

Wavelength=0.71073

Cell: a=18.0063(9) b=12.3925(7) c=24.4944(13)  
       alpha=90 beta=106.133(4) gamma=90  
 Temperature: 296 K

|                | Calculated                                    | Reported                            |
|----------------|-----------------------------------------------|-------------------------------------|
| Volume         | 5250.5(5)                                     | 5250.5(5)                           |
| Space group    | P 21/n                                        | P 1 21/n 1                          |
| Hall group     | -P 2yn                                        | -P 2yn                              |
| Moiety formula | 2(C39 H21 N15 O15 Tb0.98<br>Yb1.02), 6(O0.50) | ?                                   |
| Sum formula    | C78 H42 N30 O35 Tb1.96<br>Yb2.04              | C39 H21 N15 O17.50 Tb0.98<br>Yb1.02 |
| Mr             | 2623.92                                       | 1311.95                             |
| Dx,g cm-3      | 1.660                                         | 1.660                               |
| Z              | 2                                             | 4                                   |
| Mu (mm-1)      | 3.195                                         | 3.195                               |
| F000           | 2540.4                                        | 2540.0                              |
| F000'          | 2539.33                                       |                                     |
| h,k,lmax       | 21,14,29                                      | 21,14,29                            |
| Nref           | 9610                                          | 9574                                |
| Tmin,Tmax      | 0.851,0.906                                   | 0.770,0.910                         |
| Tmin'          | 0.463                                         |                                     |

Correction method= # Reported T Limits: Tmin=0.770 Tmax=0.910  
 AbsCorr = MULTI-SCAN

Data completeness= 0.996

Theta(max)= 25.350

R(reflections)= 0.0597( 5783)

wR2(reflections)= 0.2051( 9574)

S = 1.020

Npar= 669

The following ALERTS were generated. Each ALERT has the format

**test-name\_ALERT\_alert-type\_alert-level.**

Click on the hyperlinks for more details of the test.

---

### Alert level A

PLAT602\_ALERT\_2\_A VERY LARGE Solvent Accessible VOID(S) in Structure ! Info

**Author Response: There are disordered solvent molecules in the voids that could not be included in the model.**

---

### Alert level B

RINTA01\_ALERT\_3\_B The value of Rint is greater than 0.18

Rint given 0.187

|                   |                                          |                     |         |       |
|-------------------|------------------------------------------|---------------------|---------|-------|
| PLAT306_ALERT_2_B | Isolated Oxygen Atom (H-atoms Missing ?) | .....               | 016W    | Check |
| PLAT306_ALERT_2_B | Isolated Oxygen Atom (H-atoms Missing ?) | .....               | 017W    | Check |
| PLAT342_ALERT_3_B | Low Bond Precision on C-C Bonds          | .....               | 0.02233 | Ang.  |
| PLAT430_ALERT_2_B | Short Inter D...A Contact                | O8 ..017W .         | 2.78    | Ang.  |
|                   |                                          | 1+x,1+y,z =         | 1_665   | Check |
| PLAT430_ALERT_2_B | Short Inter D...A Contact                | O9 ..018W .         | 2.83    | Ang.  |
|                   |                                          | 1/2-x,1/2+y,3/2-z = | 2_556   | Check |
| PLAT430_ALERT_2_B | Short Inter D...A Contact                | O15T ..017W .       | 2.80    | Ang.  |
|                   |                                          | 1-x,1-y,1-z =       | 3_666   | Check |
| PLAT430_ALERT_2_B | Short Inter D...A Contact                | O15T ..016W .       | 2.82    | Ang.  |
|                   |                                          | x,1+y,z =           | 1_565   | Check |
| PLAT430_ALERT_2_B | Short Inter D...A Contact                | O17W ..018W .       | 2.74    | Ang.  |
|                   |                                          | x,y,z =             | 1_555   | Check |

---

### Alert level C

|                   |                                               |                     |        |       |
|-------------------|-----------------------------------------------|---------------------|--------|-------|
| PLAT077_ALERT_4_C | Unitcell Contains Non-integer Number of Atoms | ..                  | Please | Check |
| PLAT220_ALERT_2_C | NonSolvent Resd 1 C Ueq(max) / Ueq(min) Range |                     | 3.9    | Ratio |
| PLAT234_ALERT_4_C | Large Hirshfeld Difference                    | O5 --C22 .          | 0.17   | Ang.  |
| PLAT241_ALERT_2_C | High MainMol Ueq as Compared to Neighbors of  |                     | 014T   | Check |
| PLAT241_ALERT_2_C | High MainMol Ueq as Compared to Neighbors of  |                     | 015T   | Check |
| PLAT241_ALERT_2_C | High MainMol Ueq as Compared to Neighbors of  |                     | C17    | Check |
| PLAT241_ALERT_2_C | High MainMol Ueq as Compared to Neighbors of  |                     | C30    | Check |
| PLAT242_ALERT_2_C | Low MainMol Ueq as Compared to Neighbors of   |                     | C27    | Check |
| PLAT430_ALERT_2_C | Short Inter D...A Contact                     | O11 ..016W .        | 2.87   | Ang.  |
|                   |                                               | 3/2-x,1/2+y,3/2-z = | 2_656  | Check |
| PLAT430_ALERT_2_C | Short Inter D...A Contact                     | O14T ..017W .       | 2.89   | Ang.  |
|                   |                                               | 1-x,1-y,1-z =       | 3_666  | Check |
| PLAT480_ALERT_4_C | Long H...A H-Bond Reported                    | H7 ..05 .           | 2.66   | Ang.  |
| PLAT480_ALERT_4_C | Long H...A H-Bond Reported                    | H24 ..017W .        | 2.64   | Ang.  |

---

### Alert level G

|                   |                                                  |       |       |        |
|-------------------|--------------------------------------------------|-------|-------|--------|
| PLAT004_ALERT_5_G | Polymeric Structure Found with Maximum Dimension |       | 1     | Info   |
| PLAT020_ALERT_3_G | The Value of Rint is Greater Than 0.12           | ..... | 0.187 | Report |

|                   |                                                  |      |              |
|-------------------|--------------------------------------------------|------|--------------|
| PLAT045_ALERT_1_G | Calculated and Reported Z Differ by a Factor ... | 0.50 | Check        |
| PLAT068_ALERT_1_G | Reported F000 Differs from Calcd (or Missing)... |      | Please Check |
| PLAT072_ALERT_2_G | SHELXL First Parameter in WGHT Unusually Large   | 0.11 | Report       |
| PLAT171_ALERT_4_G | The CIF-Embedded .res File Contains EADP Records | 2    | Report       |
| PLAT232_ALERT_2_G | Hirshfeld Test Diff (M-X) Yb2 --O12 .            | 5.4  | s.u.         |
| PLAT232_ALERT_2_G | Hirshfeld Test Diff (M-X) Tb2 --O12 .            | 5.4  | s.u.         |
| PLAT300_ALERT_4_G | Atom Site Occupancy of Yb1 Constrained at        | 0.51 | Check        |
| PLAT300_ALERT_4_G | Atom Site Occupancy of Yb2 Constrained at        | 0.51 | Check        |
| PLAT300_ALERT_4_G | Atom Site Occupancy of Tb1 Constrained at        | 0.49 | Check        |
| PLAT300_ALERT_4_G | Atom Site Occupancy of Tb2 Constrained at        | 0.49 | Check        |
| PLAT300_ALERT_4_G | Atom Site Occupancy of O18W Constrained at       | 0.5  | Check        |
| PLAT301_ALERT_3_G | Main Residue Disorder .....(Resd 1 )             | 3%   | Note         |
| PLAT302_ALERT_4_G | Anion/Solvent/Minor-Residue Disorder (Resd 4 )   | 100% | Note         |
| PLAT311_ALERT_2_G | Isolated Disordered Oxygen Atom (No H's ?) ..... | O18W | Check        |
| PLAT650_ALERT_4_G | SWAT Instruction Used to Model Solvent Disorder  |      | ! Report     |
| PLAT720_ALERT_4_G | Number of Unusual/Non-Standard Labels .....      | 1    | Note         |
| PLAT764_ALERT_4_G | Overcomplete CIF Bond List Detected (Rep/Expd) . | 1.19 | Ratio        |
| PLAT883_ALERT_1_G | No Info/Value for _atom_sites_solution_primary . |      | Please Do !  |

---

1 **ALERT level A** = Most likely a serious problem - resolve or explain  
 9 **ALERT level B** = A potentially serious problem, consider carefully  
 12 **ALERT level C** = Check. Ensure it is not caused by an omission or oversight  
 20 **ALERT level G** = General information/check it is not something unexpected

3 ALERT type 1 CIF construction/syntax error, inconsistent or missing data  
 20 ALERT type 2 Indicator that the structure model may be wrong or deficient  
 4 ALERT type 3 Indicator that the structure quality may be low  
 14 ALERT type 4 Improvement, methodology, query or suggestion  
 1 ALERT type 5 Informative message, check

---

## Datablock: TbYbL402367

---

Bond precision: C-C = 0.0076 A

Wavelength=0.71073

|              |              |                 |             |
|--------------|--------------|-----------------|-------------|
| Cell:        | a=8.6338(18) | b=15.998(2)     | c=12.721(3) |
|              | alpha=90     | beta=90.686(11) | gamma=90    |
| Temperature: | 296 K        |                 |             |

|                | Calculated                     | Reported                       |
|----------------|--------------------------------|--------------------------------|
| Volume         | 1756.9(6)                      | 1756.9(6)                      |
| Space group    | C 2/c                          | C 1 2/c 1                      |
| Hall group     | -C 2yc                         | -C 2yc                         |
| Moiety formula | C13 H8 N7 O10 Tb0.38<br>Yb0.62 | ?                              |
| Sum formula    | C13 H8 N7 O10 Tb0.38<br>Yb0.62 | C13 H8 N7 O10 Tb0.38<br>Yb0.62 |
| Mr             | 589.94                         | 589.94                         |
| Dx,g cm-3      | 2.230                          | 2.230                          |
| Z              | 4                              | 4                              |
| Mu (mm-1)      | 4.907                          | 4.906                          |
| F000           | 1132.4                         | 1132.0                         |
| F000'          | 1131.78                        |                                |
| h,k,lmax       | 10,19,15                       | 10,19,15                       |
| Nref           | 1612                           | 1611                           |
| Tmin,Tmax      | 0.843,0.925                    | 0.780,0.930                    |
| Tmin'          | 0.563                          |                                |

Correction method= # Reported T Limits: Tmin=0.780 Tmax=0.930  
AbsCorr = MULTI-SCAN

Data completeness= 0.999                      Theta(max)= 25.350

R(reflections)= 0.0332( 1384)              wR2(reflections)= 0.0642( 1611)

S = 1.057                                      Npar= 142

The following ALERTS were generated. Each ALERT has the format

**test-name\_ALERT\_alert-type\_alert-level.**

Click on the hyperlinks for more details of the test.

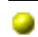

#### Alert level C

RINTA01\_ALERT\_3\_C The value of Rint is greater than 0.12

Rint given 0.140

PLAT077\_ALERT\_4\_C Unitcell Contains Non-integer Number of Atoms ..

Please Check

PLAT213\_ALERT\_2\_C Atom O2 has ADP max/min Ratio .....

3.8 prolat

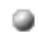

#### Alert level G

|                                                                    |              |
|--------------------------------------------------------------------|--------------|
| PLAT004_ALERT_5_G Polymeric Structure Found with Maximum Dimension | 1 Info       |
| PLAT007_ALERT_5_G Number of Unrefined Donor-H Atoms .....          | 1 Report     |
| PLAT020_ALERT_3_G The Value of Rint is Greater Than 0.12 .....     | 0.140 Report |
| PLAT068_ALERT_1_G Reported F000 Differs from Calcd (or Missing)... | Please Check |
| PLAT083_ALERT_2_G SHELXL Second Parameter in WGHT Unusually Large  | 8.98 Why ?   |
| PLAT171_ALERT_4_G The CIF-Embedded .res File Contains EADP Records | 1 Report     |
| PLAT300_ALERT_4_G Atom Site Occupancy of Yb1 Constrained at        | 0.62 Check   |
| PLAT300_ALERT_4_G Atom Site Occupancy of Tb1 Constrained at        | 0.38 Check   |
| PLAT300_ALERT_4_G Atom Site Occupancy of H2O Constrained at        | 0.5 Check    |
| PLAT301_ALERT_3_G Main Residue Disorder .....(Resd 1 )             | 6% Note      |
| PLAT764_ALERT_4_G Overcomplete CIF Bond List Detected (Rep/Expd) . | 1.26 Ratio   |
| PLAT883_ALERT_1_G No Info/Value for _atom_sites_solution_primary . | Please Do !  |

---

0 **ALERT level A** = Most likely a serious problem - resolve or explain  
0 **ALERT level B** = A potentially serious problem, consider carefully  
3 **ALERT level C** = Check. Ensure it is not caused by an omission or oversight  
13 **ALERT level G** = General information/check it is not something unexpected

2 **ALERT type 1** CIF construction/syntax error, inconsistent or missing data  
3 **ALERT type 2** Indicator that the structure model may be wrong or deficient  
3 **ALERT type 3** Indicator that the structure quality may be low  
6 **ALERT type 4** Improvement, methodology, query or suggestion  
2 **ALERT type 5** Informative message, check

---

It is advisable to attempt to resolve as many as possible of the alerts in all categories. Often the minor alerts point to easily fixed oversights, errors and omissions in your CIF or refinement strategy, so attention to these fine details can be worthwhile. In order to resolve some of the more serious problems it may be necessary to carry out additional measurements or structure refinements. However, the purpose of your study may justify the reported deviations and the more serious of these should normally be commented upon in the discussion or experimental section of a paper or in the "special\_details" fields of the CIF. checkCIF was carefully designed to identify outliers and unusual parameters, but every test has its limitations and alerts that are not important in a particular case may appear. Conversely, the absence of alerts does not guarantee there are no aspects of the results needing attention. It is up to the individual to critically assess their own results and, if necessary, seek expert advice.

### **Publication of your CIF in IUCr journals**

A basic structural check has been run on your CIF. These basic checks will be run on all CIFs submitted for publication in IUCr journals (*Acta Crystallographica*, *Journal of Applied Crystallography*, *Journal of Synchrotron Radiation*); however, if you intend to submit to *Acta Crystallographica Section C* or *E* or *IUCrData*, you should make sure that full publication checks are run on the final version of your CIF prior to submission.

### **Publication of your CIF in other journals**

Please refer to the *Notes for Authors* of the relevant journal for any special instructions relating to CIF submission.

---

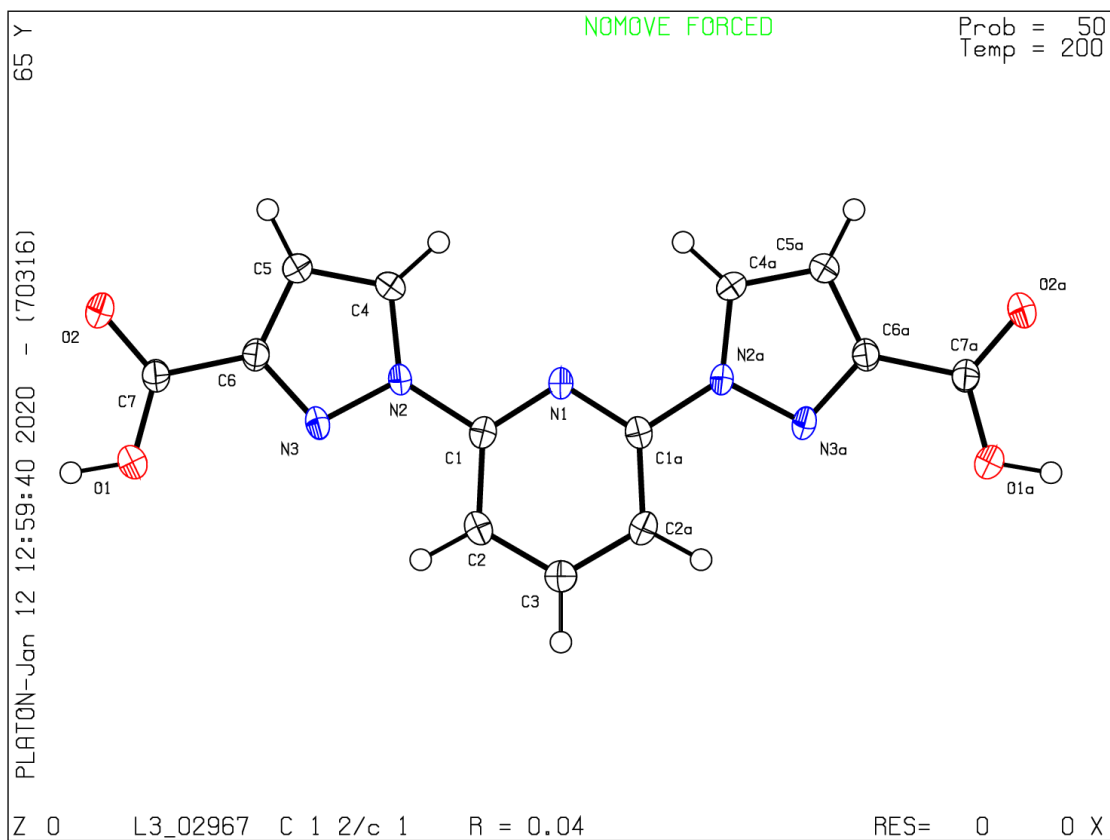

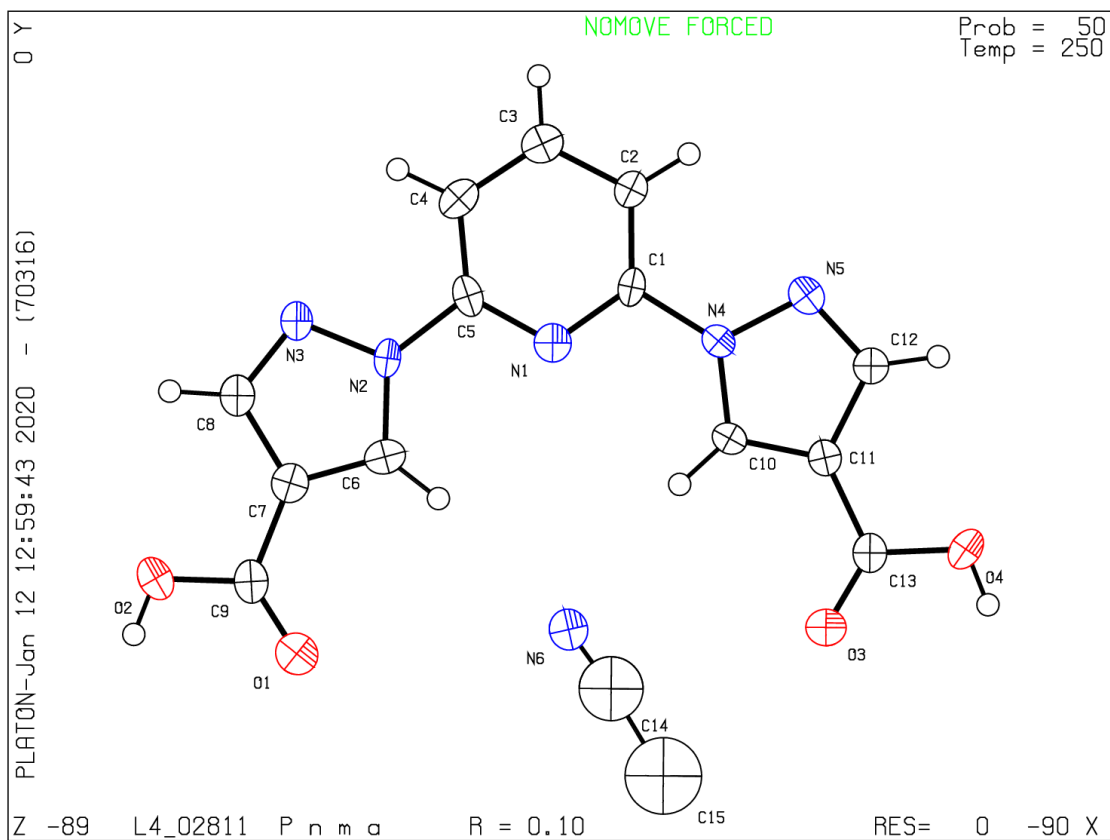

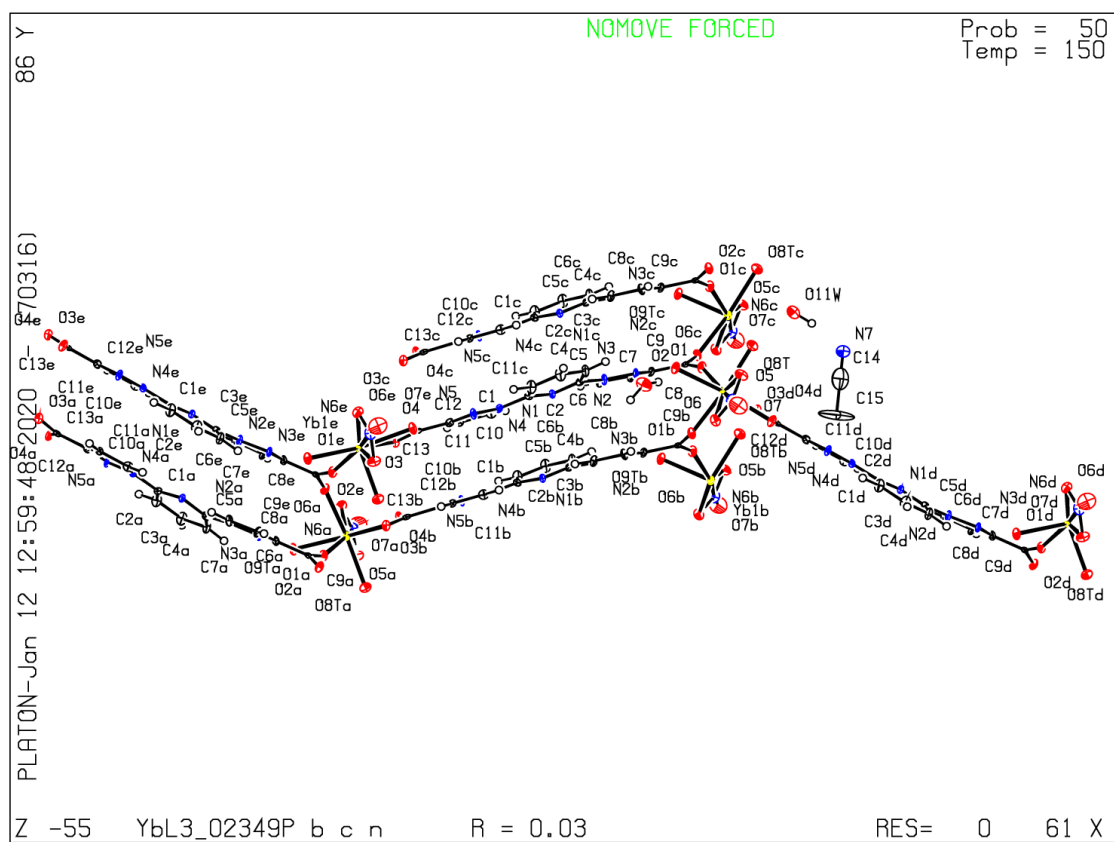

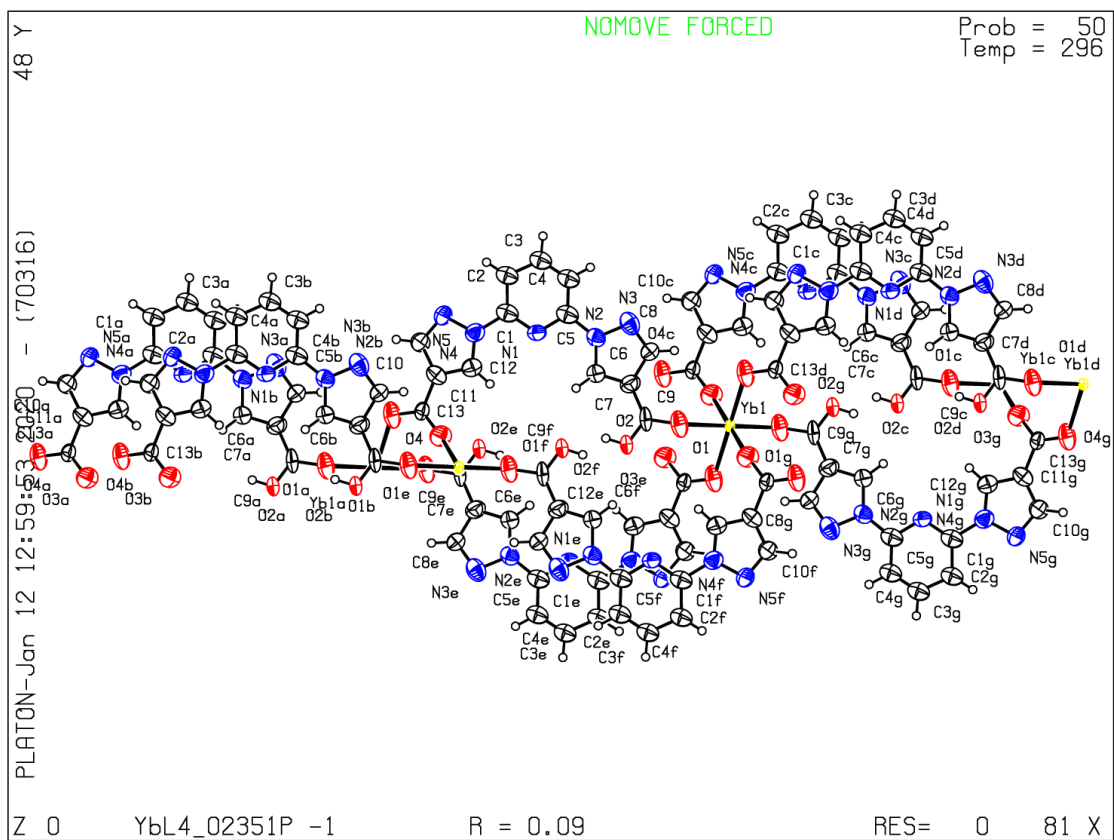

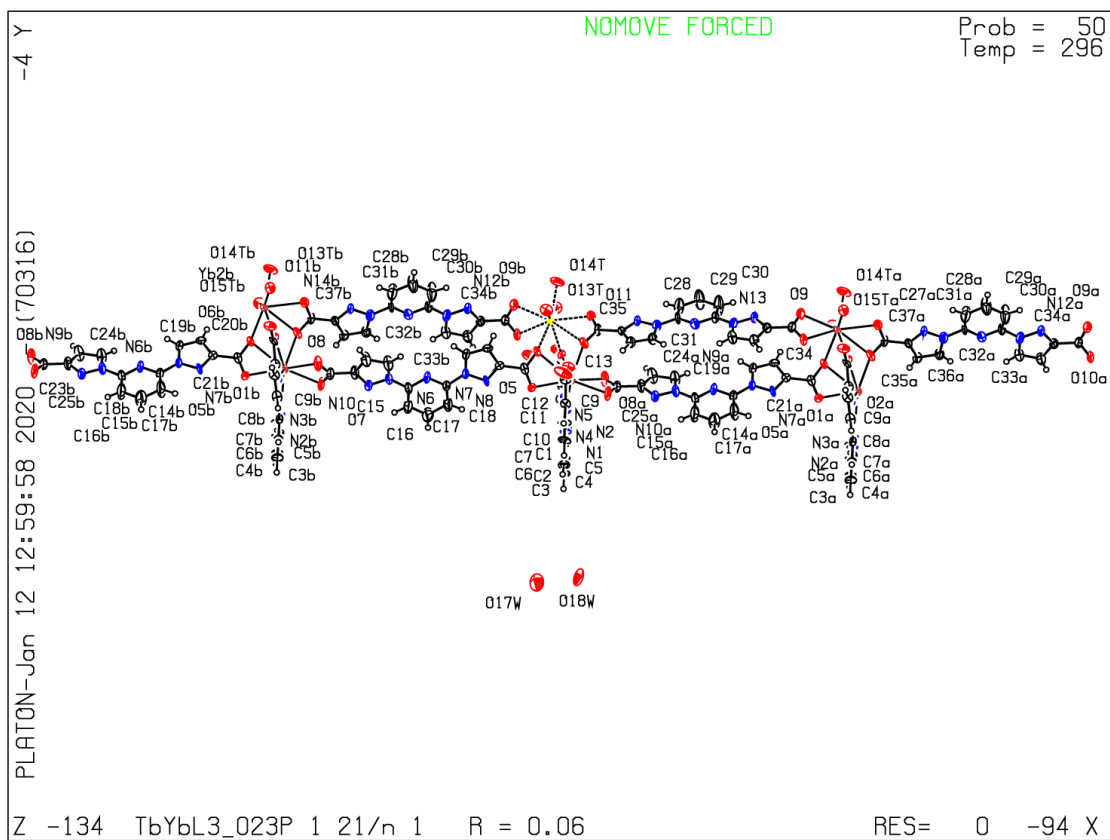

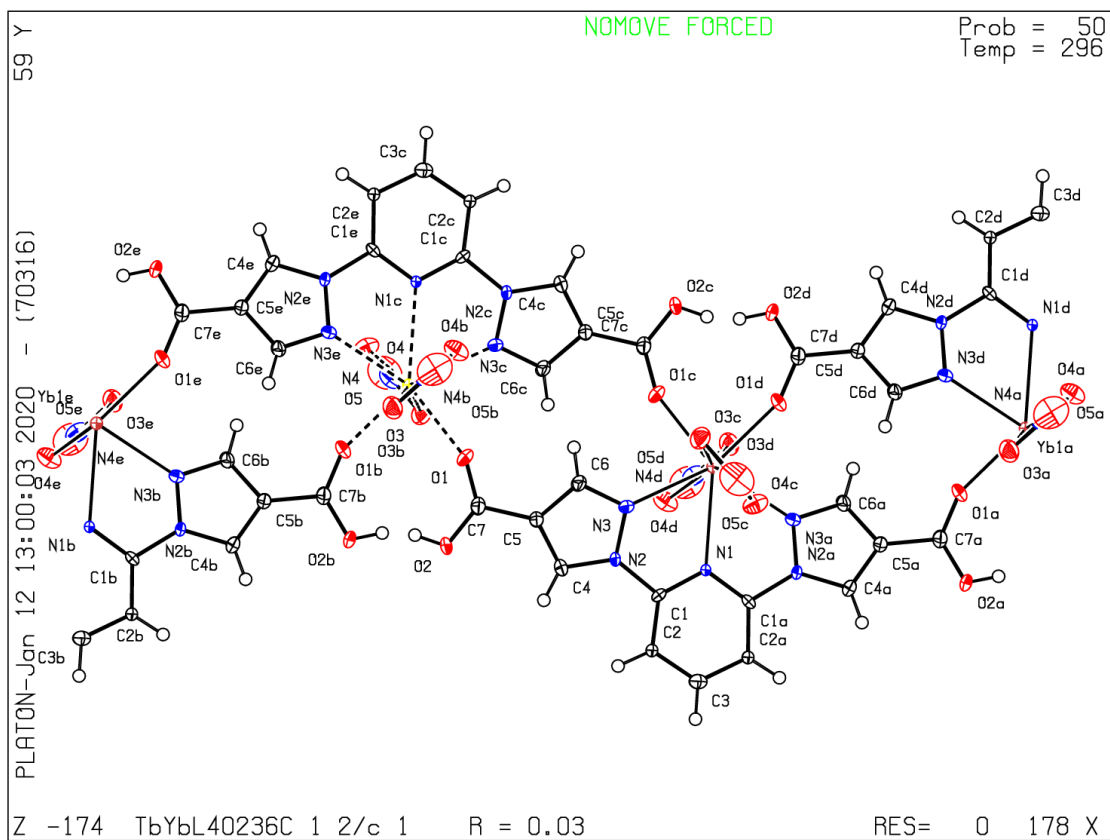

Supplement: s1 [file s1]
